# Supplementary material for: The chemerin/CMKLR1 axis regulates intestinal graft-versus-host disease
Source: JCI journal article supplement (doi:10.1172/jci.insight.154440), 2023-03-07
Supplement: sd1 [file 1]

You are being redirected.
